# Supplementary material for: Cross-Species Co-analysis of Prefrontal Cortex Chronic Ethanol Transcriptome Responses in Mice and Monkeys
Source: Front Mol Neurosci. 2019 Aug 13;12:197. doi: 10.3389/fnmol.2019.00197 (PMC6701453; doi:10.3389/fnmol.2019.00197)
Supplement: Supplementary file 1 [file Table_1.XLSX]

## Sheet: Sheet1
Phenotype Name	Description
RIN	RNA integrity number or RNA quality index from the Bioanalyzer or Experion system, run on RNA prior to microarray analysis
Cohort	MATRR cohort; cohort 4 = 4, cohort 5 =5, cohort 7a = 7, cohort 7b = 7.3
Treatment	Treatment group; Ethanol = 1, Control = 0
Weight	Animal's weight prior to necropsy
Age at EtOH Onset	Animal's age, in days, at the time of first exposure to ethanol
Avg Daily Food Intake	Average daily food intake, measured in food pellets
Avg Daily Water Intake	Average daily water intake, in mL, during the open access period
Drinking Category	Categorical measure of the animal's drinking, as provided on the MATRR website. Control = 0, Low drinker = 1, Heavy Drinker = 2, Very Heavy Drinker = 3, Binge Drinker = 4
Avg BEC	Average blood ethanol content during the whole open access period
First 6mo Avg BEC	Average blood ethanol content during the first six months of open access
Second 6mo Avg BEC	Average blood ethanol content during the second six months of open access
Delta BEC 6-12 mo	Change in average blood ethanol content from the first six months to the second six months; (12 mo BEC minus 6 mo BEC)
Avg Daily EtOH Intake	Average daily ethanol intake, measured in g/kg, during the whole open access period
First 6mo Avg EtOH Intake	Average daily ethanol intake, measured in g/kg, during the first six months of open access
Second 6mo Avg EtOH Intake	Average daily ethanol intake, measured in g/kg, during the second six months of open access
Delta EtOH Intake 6-12 mo	Change in average ethanol intake from the first six months to the second six months; (12 mo intake minus 6 mo intake)
EtOH Preference	Ethanol preference, measured by dividing the animal's average daily ethanol intake by the average daily water intake
Pct Days over 4 gkg	Percentage of days during the open access period where the animal consumed greater than 4 g/kg ethanol
Pct Days over 3 gkg	Percentage of days during the open access period where the animal consumed greater than 3 g/kg ethanol
Pct Days over 2 gkg	Percentage of days during the open access period where the animal consumed greater than 2 g/kg ethanol
Avg Bout Start Time	Average number of seconds elapsed between the beginning of daily ethanol access and the first drinking bout.
Avg Bouts per Day	Average number of drinking bouts per day during the open access period
Avg Bout Volume	Average volume of drinking bouts, in mL
Avg First Bout Volume	Average volume of the first drinking bout of the day, in mL
Bout Avg Rate of Intake	Average rate of ethanol intake during a drinking bout
Bout Avg Pct of Daily Intake	Average percentage of the total daily ethanol intake consumed in one drinking bout
Avg Max Bout Pct of Daily Intake	Average percentage of the total daily ethanol intake consumed in the largest drinking bout of the day
Avg Pct of Intake After Last Pellet	Average percentage of daily ethanol intake occurring after the last food pellet of the day has been acquired
Avg Cortisol	Average cortisol level during the whole open access period
Avg ACTH	Average adrenocorticotropic hormone level during the whole open access period
Avg Testosterone	Average testosterone level during the whole open access period
Avg DOC	Average deoxycorticosterone level during the whole open access period
Avg Aldosterone	Average aldosterone level during the whole open access period
Avg DHEAS	Average dehydroepiandrosterone level during the whole open access period

## Sheet: Sheet2
Phenotype Name	RIN	Cohort	Treatment	Age at Necropsy	Drinking Category	Avg Daily EtOH Intake	First 6mo Avg EtOH Intake	Second 6mo Avg EtOH Intake	Delta EtOH Intake 6-12 mo	Avg BEC	First 6mo Avg BEC	Second 6mo Avg BEC	Delta BEC 6-12 mo	Pct Days over 4 gkg	Pct Days over 2 gkg	Avg Daily Water Intake	EtOH Preference	Avg Bouts per Day	Bout Avg Volume	Avg First Bout Volume	Avg Rate of Intake	Bout Avg Pct of Total Intake	Max Bout Avg Pct of Total Intake	Avg Pct of Intake After Last Pellet	Avg Daily Food Pellet Intake	Avg Cortisol	Avg ACTH	Avg Testosterone	Avg DOC	Avg Ald	Avg DHEAS
Description	RNA integrity number or RNA quality index from the Bioanalyzer or Experion system, run on RNA prior to microarray analysis	MATRR cohort; cohort 4 = 4, cohort 5 =5, cohort 7a = 7, cohort 7b = 7.3	Treatment group; Ethanol = 1, Control = 0	Animal's age at time of necropsy, in days	Categorical measure of the animal's drinking, as provided on the MATRR website. Control = 0, Low drinker = 1, Heavy Drinker = 2, Very Heavy Drinker = 3, Binge Drinker = 4	Average daily ethanol intake, measured in g/kg, during the whole open access period	Average daily ethanol intake, measured in g/kg, during the first six months of open access	Average daily ethanol intake, measured in g/kg, during the second six months of open access	Change in average ethanol intake from the first six months to the second six months; (12 mo intake minus 6 mo intake)	Average blood ethanol content during the whole open access period	Average blood ethanol content during the first six months of open access	Average blood ethanol content during the second six months of open access	Change in average blood ethanol content from the first six months to the second six months; (12 mo BEC minus 6 mo BEC)	Percentage of days during the open access period where the animal consumed greater than 4 g/kg ethanol	Percentage of days during the open access period where the animal consumed greater than 2 g/kg ethanol	Average daily water intake, in mL, during the open access period	Ethanol preference, measured by dividing the animal's average daily ethanol intake by the average daily water intake	Average number of drinking bouts per day during the open access period	Average volume of drinking bouts, in mL	Average volume of the first drinking bout of the day, in mL	Average rate of ethanol intake during a drinking bout	Average percentage of the total daily ethanol intake consumed in one drinking bout	Average percentage of the total daily ethanol intake consumed in the largest drinking bout of the day	Average percentage of daily ethanol intake occurring after the last food pellet of the day has been acquired	Average daily food intake, measured in food pellets	Average cortisol level during the whole open access period	Average adrenocorticotropic hormone level during the whole open access period	Average testosterone level during the whole open access period	Average deoxycorticosterone level during the whole open access period	Average aldosterone level during the whole open access period	Average dehydroepiandrosterone level during the whole open access period
Coh4_EtOH_1	9.3	4	1	4229	1	1.23822	1.44	1.06	-0.38	27.1063	32.94	22.2	-10.74	0.00454546	0.0477273	1108.27	0.00111725	19.5704	17.6939	37.6993	0.0671635	0.0510977	26.6979	0.46612	152.442	24.192	30	6.693	323.1	125.984	0.1025
Coh4_EtOH_2	9.3	4	1	4217	2	2.62687	2.48	2.75	0.27	35.9369	39.21	33.08	-6.13	0.0181818	0.781818	1272.87	0.00206374	19.6929	33.8826	29.7622	0.118869	0.0507798	17.3397	0.533637	127.523	25.708	31.9	15.001	460.1	163.612	0.0941
Coh4_EtOH_3	8.9	4	1	4000	3	2.65371	2.55	2.75	0.2	52.055	37.09	64.63	27.54	0.0681818	0.777273	1721.07	0.00154189	21.2118	31.6604	32.4382	0.109689	0.0471435	20.7314	0.496611	126.569	22.36	20.2	17.423	395.7	124.393	0.0912
Coh4_EtOH_4	8.8	4	1	3981	1	0.471322	0.41	0.52	0.11	2.36848	1.85	2.81	0.96	0	0	753.774	0.000625283	4.3944	21.2744	19.1682	0.151477	0.227562	68.1515	0.432341	182.365	28.816	11.7	6.147	393.4	154.76	0.1302
Coh4_EtOH_5	8.8	4	1	3982	1	0.27	0	0	0	0	0	0	0	NA	NA	NA	NA	NA	NA	NA	NA	NA	NA	NA	NA	23.875	29.975	9.005	345.9	139.39	0.1686
Coh4_EtOH_6	8.5	4	1	3569	3	2.52471	2.37	2.66	0.29	91.8922	70.79	109.62	38.83	0.0636364	0.702273	659.699	0.00382707	22.1155	31.4624	58.5167	0.0553867	0.0452172	21.7554	0.321172	136.135	30.859	39.9	11.754	421.9	140.46	0.1181
Coh4_EtOH_7	8.4	4	1	3714	1	1.02171	1.2	0.86	-0.34	29.7539	26.43	32.78	6.35	0	0.0340909	473.408	0.00215821	12.9681	17.9013	8.71572	0.113639	0.0771125	32.8225	0.534547	152.017	22.91	56.5	10.342	393.4	128.548	0.1597
Coh4_EtOH_8	9.1	4	1	3555	1	1.56053	1.5	1.61	0.11	30.7183	28.02	32.98	4.96	0.00227273	0.172727	1353.2	0.00115322	14.2678	31.3433	63.3654	0.0785556	0.0700878	29.5195	0.434645	146.877	21.27	25.9	9.718	316.1	147.413	0.169
Coh4_EtOH_9	9.4	4	1	3209	3	2.29197	2.27	2.32	0.05	94.3028	91.83	96.38	4.55	0.0113636	0.652273	1385.21	0.0016546	15.7365	32.6999	51.0458	0.121303	0.0635467	32.5435	0.43825	99.4064	19.472	21.7	9.79	406.3	150.683	0.2146
Coh4_EtOH_10	9.1	4	1	3258	1	1.99463	1.87	2.1	0.23	55.3883	41.45	67.09	25.64	0.00454546	0.472727	1880.98	0.00106042	23.516	20.8509	12.0349	0.0617234	0.0425243	18.5559	0.522103	108.826	18.434	38.4	9.598	343.5	119.101	0.0855
Coh4_EtOH_11	9.1	4	1	3257	3	2.44988	2.2	2.67	0.47	52.6109	45.32	58.73	13.41	0.0318182	0.688636	1441.11	0.00169999	26.0714	20.0559	22.7111	0.132858	0.0383562	16.3852	0.539887	109.906	22.247	24.1	13.286	418.8	266.69	0.3337
Coh5_Ctrl_12	9.3	5	0	3003	0	NA	NA	NA	NA	NA	NA	NA	NA	NA	NA	NA	NA	NA	NA	NA	NA	NA	NA	NA	NA	NA	NA	NA	NA	NA	NA
Coh5_Ctrl_13	9.5	5	0	2958	0	NA	NA	NA	NA	NA	NA	NA	NA	NA	NA	NA	NA	NA	NA	NA	NA	NA	NA	NA	NA	NA	NA	NA	NA	NA	NA
Coh5_Ctrl_14	9.3	5	0	2245	0	NA	NA	NA	NA	NA	NA	NA	NA	NA	NA	NA	NA	NA	NA	NA	NA	NA	NA	NA	NA	NA	NA	NA	NA	NA	NA
Coh5_Ctrl_15	9.4	5	0	2153	0	NA	NA	NA	NA	NA	NA	NA	NA	NA	NA	NA	NA	NA	NA	NA	NA	NA	NA	NA	NA	NA	NA	NA	NA	NA	NA
Coh5_Ctrl_16	8.9	5	0	2013	0	NA	NA	NA	NA	NA	NA	NA	NA	NA	NA	NA	NA	NA	NA	NA	NA	NA	NA	NA	NA	NA	NA	NA	NA	NA	NA
Coh5_EtOH_17	9.1	5	1	2604	3	2.55272	2.6	2.5	-0.1	90.1429	78.14	106.15	28.01	0.0218579	0.819672	1989.74	0.00128294	18.1008	33.4453	29.419	0.20589	0.0552461	18.3624	0.233345	131.196	57.375	21.0388	7.8375	238.375	135.539	0.0975
Coh5_EtOH_18	9.1	5	1	2656	4	3.77841	3.86	3.69	-0.17	118.459	107.28	130.19	22.91	0.34153	0.942623	1306.39	0.00289226	13.8997	56.1549	55.8756	0.276365	0.0719439	25.2843	0.270652	90.4814	26.625	19.5787	7.23375	245.875	179.565	0.23575
Coh5_EtOH_19	9.2	5	1	2689	4	4.09645	4.39	3.79	-0.6	136.651	158.58	107.41	-51.17	0.510929	0.964481	1613.63	0.00253866	27.5169	28.3697	22.8812	0.154988	0.0363414	18.908	0.304386	104.584	32.5	25.83	9.53	272.75	295.217	0.07425
Coh5_EtOH_20	8.5	5	1	2599	4	3.09526	3.84	2.35	-1.49	43.6508	71.69	6.26	-65.43	0.226776	0.814208	2551.21	0.00121325	18.7849	35.1166	30.902	0.198993	0.0532342	22.2336	0.318658	101.106	22.625	19.5987	3.93875	231	213.548	0.198125
Coh5_EtOH_21	9.3	5	1	2583	2	2.73737	2.57	2.91	0.34	98.0484	76	128.58	52.58	0.0355191	0.822404	1341.47	0.00204058	18.8796	31.7674	24.8894	0.162694	0.0529674	16.772	0.302512	98.2269	62.2857	25.4257	3.99857	327.143	122.293	0.344286
Coh5_EtOH_22	8.8	5	1	2688	2	3.09132	2.79	3.4	0.61	87.1935	71.86	108.42	36.56	0.0765027	0.901639	1977	0.00156364	17.7263	43.9538	33.6304	0.222834	0.0564135	19.4904	0.271738	101.751	28.625	18.665	7.6275	280.25	316.07	0.11775
Coh5_EtOH_23	9.1	5	1	2631	4	3.27817	3.66	2.88	-0.78	141.21	141.17	141.27	0.1	0.202186	0.923497	1330.97	0.002463	19.7345	39.6918	65.0816	0.213649	0.0506728	22.2702	0.243919	97.7203	19.375	21.6812	13.215	305	154.914	0.117625
Coh5_EtOH_24	9.3	5	1	2645	2	3.08741	3.26	2.9	-0.36	102.951	103.03	102.84	-0.19	0.0218579	0.931694	424.47	0.00727357	22.1547	29.9223	25.1258	0.154012	0.0451371	19.808	0.304403	139.994	20.375	19.14	7.53	228.125	146.564	0.1715
Coh7a_Ctrl_25	7.4	7	0	2146	0	NA	NA	NA	NA	NA	NA	NA	NA	NA	NA	NA	NA	NA	NA	NA	NA	NA	NA	NA	NA	NA	NA	NA	NA	NA	NA
Coh7a_Ctrl_26	6.9	7	0	2176	0	NA	NA	NA	NA	NA	NA	NA	NA	NA	NA	NA	NA	NA	NA	NA	NA	NA	NA	NA	NA	NA	NA	NA	NA	NA	NA
Coh7a_Ctrl_27	7.3	7	0	2178	0	NA	NA	NA	NA	NA	NA	NA	NA	NA	NA	NA	NA	NA	NA	NA	NA	NA	NA	NA	NA	NA	NA	NA	NA	NA	NA
Coh7a_Ctrl_28	6.8	7	0	2148	0	NA	NA	NA	NA	NA	NA	NA	NA	NA	NA	NA	NA	NA	NA	NA	NA	NA	NA	NA	NA	NA	NA	NA	NA	NA	NA
Coh7a_EtOH_29	7	7	1	2250	1	1.95399	1.51	2.5	0.99	32.4531	9.59	68.12	58.53	0.0027027	0.42973	971.15	0.00201204	13.2906	29.706	61.3501	0.295942	0.0752412	35.0262	0.295802	126.094	28.7143	18.7286	2.17286	273.286	71.7986	0.125714
Coh7a_EtOH_30	6.4	7	1	2140	3	2.34328	2.19	2.53	0.34	33.2188	40.52	21.04	-19.48	0.0027027	0.675676	753.41	0.00311023	17.1026	26.018	28.302	0.165022	0.0584708	30.8538	0.455008	148.966	42.2857	26.8371	6.50429	392.714	146.986	0.198857
Coh7a_EtOH_31	6.1	7	1	2186	2	2.81966	2.23	3.54	1.31	66.5538	42.13	105.64	63.51	0.127027	0.678378	1426.96	0.00197599	18.6895	29.0816	77.8661	0.152139	0.0535061	25.2518	0.349745	124.581	35.7143	18.5214	1.43	328.429	150.126	0.194286
Coh7a_EtOH_32	5.4	7	1	2099	1	1.81723	1.48	2.23	0.75	35.8906	20.69	59.6	38.91	0	0.359459	459.018	0.00395896	21.4274	17.3084	27.8148	0.127175	0.0466693	22.1867	0.437598	141.752	29	12.2429	2.05	231.143	82.9686	0.109
Coh7a_EtOH_33	6.3	7	1	2131	2	3.00648	2.76	3.31	0.55	74.7538	60.2	98.04	37.84	0.0459459	0.913514	1092.23	0.0027526	24.0627	23.764	24.8587	0.150965	0.0415581	18.9546	0.465512	125.937	24.1429	21.8057	3.86143	300.571	205.54	0.127857
Coh7a_EtOH_34	6.6	7	1	2133	4	3.09162	2.58	3.72	1.14	73	51.15	107.96	56.81	0.145946	0.816216	1092.14	0.00283079	29.5071	24.22	93.8017	0.088527	0.0338901	22.2302	0.303035	160.929	41.1429	18.2414	2.3	338.429	208.63	0.279
Coh7a_EtOH_35	5.7	7	1	2008	4	3.32002	3.34	3.29	-0.05	96.9194	87.15	110.13	22.98	0.221622	0.854054	952.995	0.00348378	22.0229	27.9622	63.2089	0.139344	0.0454072	25.3526	0.326451	114.974	45.8571	14.4871	2.83857	279.857	145.041	0.286
Coh7a_EtOH_36	6	7	1	2114	1	1.85222	1.39	2.41	1.02	20.6406	10.62	36.28	25.66	0	0.42973	825.868	0.00224276	10.9601	31.574	37.5655	0.174514	0.0912399	35.2135	0.368841	168.598	87.4286	27.7371	3.17	385.429	99.6486	0.130714
Coh7b_Ctrl_37	NA	7.3	0	2673	0	NA	NA	NA	NA	NA	NA	NA	NA	NA	NA	NA	NA	NA	NA	NA	NA	NA	NA	NA	NA	NA	NA	NA	NA	NA	NA
Coh7b_Ctrl_38	9.6	7.3	0	2730	0	NA	NA	NA	NA	NA	NA	NA	NA	NA	NA	NA	NA	NA	NA	NA	NA	NA	NA	NA	NA	NA	NA	NA	NA	NA	NA
Coh7b_EtOH_39	7.6	7.3	1	2611	1	1.4334	1.46	1.41	-0.05	48.1525	51.03	45.17	-5.86	0	0.112994	426.042	0.00336446	17.9735	16.9312	27.7812	0.136147	0.0556374	26.6115	0.398264	96.8065	22.9214	32.9	6.49429	322.857	104.749	0.152857
Coh7b_EtOH_40	6.5	7.3	1	2557	3	2.27988	2.25	2.31	0.06	68.7018	61.6	76.59	14.99	0	0.752113	1246.07	0.00182967	17.0819	37.6113	112.454	0.0928357	0.0585416	36.1871	0.280203	176.883	17.0986	16.2871	5.74286	233.571	124.278	0.227429
Coh7b_EtOH_41	6.8	7.3	1	2635	1	2.0717	2.19	1.94	-0.25	60.3793	64.17	56.32	-7.85	0.0084507	0.512676	542.621	0.00381795	14.8416	26.057	84.005	0.147735	0.067378	48.1284	0.221361	142.455	24.29	81.4943	2.94286	317.429	123.879	0.242857
Coh7b_EtOH_42	3.9	7.3	1	2792	2	2.40085	1.96	2.89	0.93	100.448	69.27	133.86	64.59	0.0253521	0.642254	1614.75	0.00148683	9.1085	48.675	75.8792	0.200749	0.109788	35.6636	0.371071	151.232	25.36	80.0671	8.83	371.857	148.485	0.327
Coh7b_EtOH_43	7.8	7.3	1	2561	1	1.82261	1.22	2.48	1.26	56.8103	16.43	100.07	83.64	0.0056338	0.352113	779.891	0.00233701	15.3314	22.9986	112.277	0.1049	0.0652257	35.5138	0.370609	101.956	26.8786	25.4371	8.38286	308.286	153.452	0.174
